# Supplementary material for: Mechanisms of interleukin 4 mediated increase in efficacy of vaccines against opioid use disorders
Source: PubMed Central journal article supplement (PMC7578047; doi:10.1038/s41541-020-00247-7), 2020-10-21
Supplement: 41541_2020_247_MOESM1_ESM.pdf [file 41541_2020_247_MOESM1_ESM.pdf]

1 **Mechanisms of interleukin 4 mediated increase in efficacy of vaccines against opioid use disorders**

2 Bethany Crouse, Christine Robinson, April Huseby Kelcher, Megan Laudenbach, Juan Abrahante, and Marco  
3 Pravetoni

4

5 Supplemental materials

6 Supplemental Figure 1

7 Supplemental Figure 2

8 Supplemental Figure 3

9 Supplemental Figure 4

10 References

11

12

13

14

15

16

17

**a**

14 day

Oxycodone-specific serum antibody titer

sKLH, ♂  
 OXY-sKLH, ♂  
 OXY-sKLH+αIL-4, ♂  
 OXY-sKLH, ♀  
 OXY-sKLH+αIL-4, ♀

**b**

Serum oxycodone (ng/ml)

Oxycodone-specific serum antibody titer ( $\times 10^3$ )

$R^2=0.7190$   
 $p<0.0001$

**c**

Brain oxycodone (ng/g)

Serum oxycodone (ng/ml)

$R^2=0.6006$   
 $p<0.0001$

18  
 19

**Supplemental Figure 1. Oxycodone-specific serum IgG antibody titers correlate with serum and brain oxycodone concentrations in vaccinated mice.** Male and female mice were immunized with either OXY-sKLH or OXY-sKLH in combination with an anti-IL-4 mAb ( $\alpha$ IL-4, see Figure 1) A control group received sKLH, and included both sexes. Shown: A) oxycodone-specific serum IgG titers at 14 days after the first immunization. Significant correlations were found between: B) oxycodone-specific serum IgG antibody titers and serum oxycodone concentrations, and C) serum and brain oxycodone concentrations after *in vivo* challenge with oxycodone. Data in (B) include all 4 active vaccine groups, except for sKLH. Data in (C) include all immunized mice, including the sKLH group. Data are mean $\pm$ SEM. Sample size: n=5-6/group. Statistical analysis conducted by A) one-way ANOVA paired with Tukey's multiple comparisons post hoc test, and B-C) Pearson's linear regression test. Statistical symbols: \*  $p \leq 0.05$ , \*\*  $p \leq 0.01$ , \*\*\*\*  $p \leq 0.0001$  compared to control, or brackets to indicate differences between groups.

31  
 32

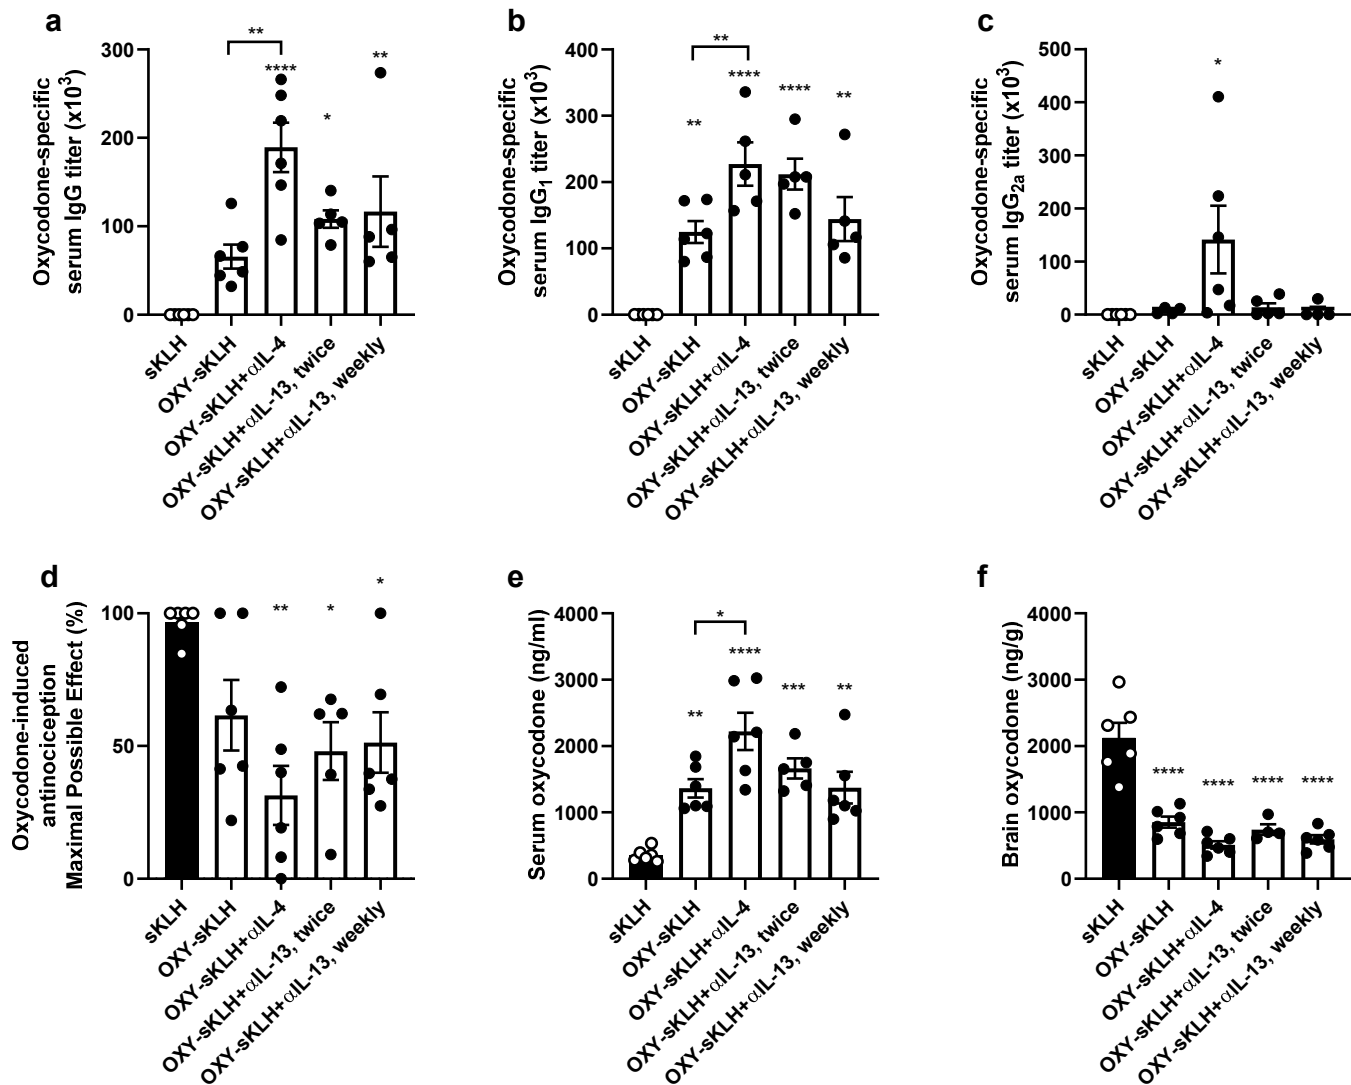

33  
34

35

36 **Supplemental Figure 2. Depletion of IL-13 did not alter vaccine efficacy against oxycodone.** Mice were  
 37 immunized on days 0, 14, and 28 with either sKLH or OXY-sKLH. Concurrently, mice immunized with OXY-  
 38 sKLH were also treated with: 1)  $\alpha$ IL-4 on days -2 and 1, 2)  $\alpha$ IL-13 on days -2 and 1, or 3)  $\alpha$ IL-13 once per  
 39 week.  $\alpha$ IL-4 was administered at a dose of 0.5 mg per injection as previously described [1].  $\alpha$ IL-13 was  
 40 administered at a dose of 0.1 mg per injection based on Genentech's recommendations. After vaccination,  
 41 oxycodone-specific serum antibody titers: A) IgG, B) IgG<sub>1</sub>, C) IgG<sub>2a</sub>. After *in vivo* oxycodone challenge, shown  
 42 effect of vaccination on: D) decreasing oxycodone-induced antinociception percent maximum possible effect  
 43 (%MPE), E) increasing opioid concentration in the serum, and F) decreasing oxycodone distribution to the  
 44 brain. Data are mean $\pm$ SEM. Sample size: n=5-6/group. Statistical analysis conducted by one-way ANOVA  
 45 paired with Tukey's multiple comparisons post hoc test. Statistical symbols: \*  $p \leq 0.05$ , \*\*  $p \leq 0.01$ , \*\*\*\*  $p \leq$   
 46 0.0001 compared to control, or brackets to indicate differences between groups.

47

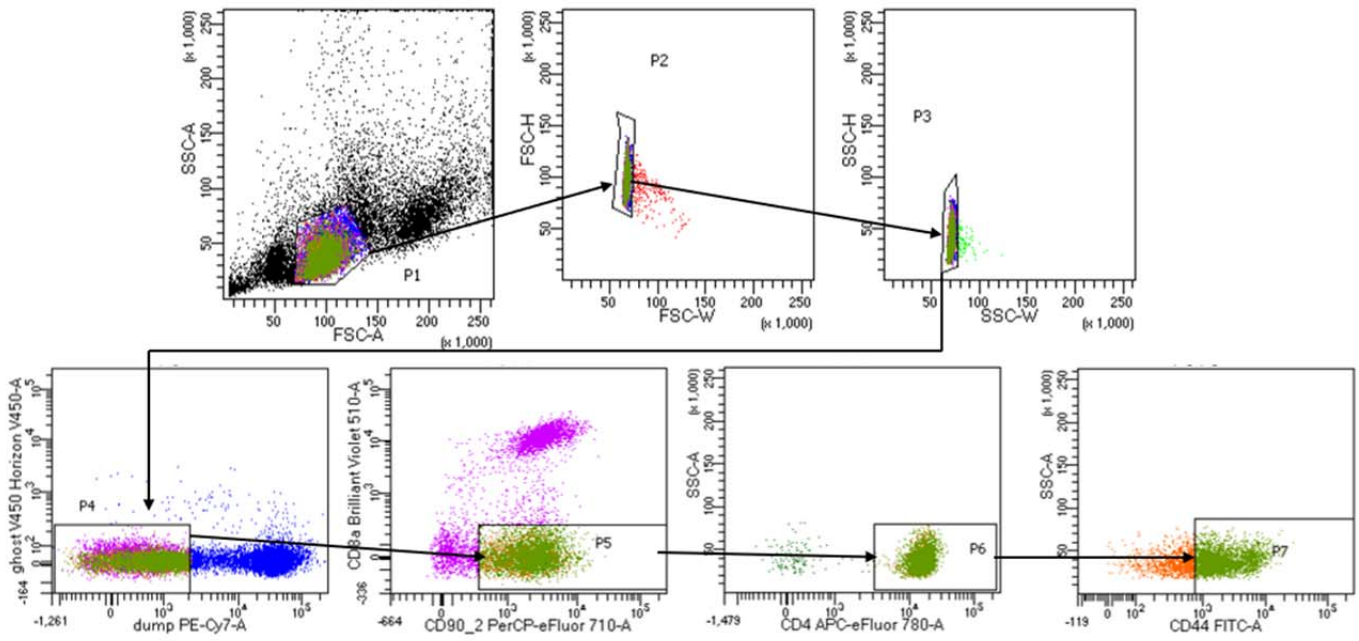

48

49 **Supplemental Figure 3. Gating strategy to isolate activated CD4<sup>+</sup> T cell lymphocytes for RNA**  
 50 **sequencing.** Cells were sorted on a FACS Aria II cell sorter for live, DUMP gate negative (B220, CD11b,  
 51 CD11c, F4/80), CD8a negative, CD90.2 positive, CD4 positive, CD44 positive cells as described [1].

| <b>sKLH vs. OXY-sKLH</b> | <b>sKLH vs. OXY-sKLH+αIL-4</b> | <b>OXY-sKLH vs. OXY-sKLH+αIL-4</b> |
|--------------------------|--------------------------------|------------------------------------|
| Chic1                    | Smpd13b                        | 2010300C02Rik                      |
| Hmgb3                    | Gm19461                        | Cacna1g                            |
| Dgkg                     | 4932416H05Rik                  | Atp1a4                             |
| Eppk1                    | 1700030O20Rik                  | C3Ap3b2                            |
| Bsn                      | Chic1                          | 4930407I10Rik                      |
| Gpm6b                    | Cmc4                           | Cd109                              |
| Map3k9                   | Il15ra                         | C130021I20Rik                      |
| Rpl36                    | Amica1                         | 3425401B19Rik                      |
| Cpne6                    | Snord34                        | Adamts2                            |
| Clcnka                   | Hmgb3                          | Ccdc155                            |
| Kremen2                  | Gpn2                           | Aldh1a2                            |
| Grip2                    | Zc3h6                          | Cdh4                               |
| Fosl1                    | Cirbp                          | Cdh23                              |
| Gm6537                   | Snord61                        | Antxr1                             |
| Slit1                    | Mctp1                          | Ccdc146                            |
| Epb4.111                 | Olfr31                         | Acsm2                              |
| Ccdc151                  | 2310002L09Rik                  | B3gat1                             |
| Loxl3                    | Spp1                           | Adgrg1                             |
| Sym                      | Abi3bp                         | 4931406B18Rik                      |
| Sdk2                     | Gpa33                          | Acsbg2                             |
| Hspg2                    | Clmp                           | Cadm2                              |
| Asic1                    | Rasef                          | Camkv                              |
| AI661453                 | Adam5                          | C4b                                |
| Ccdc40                   | Rgs22                          | Capn13                             |
| Fam186b                  | Col4a6                         | Abcg5                              |
| Dux                      | Mgam                           | Bean1                              |
| B230214G05Rik            | Nuggc                          | Adam24                             |
| Rab44                    | Mapk10                         | Acan                               |
| Dnaaf1                   | Enpp3                          | Ces1c                              |
| Rhbdf1                   | Speer3                         | BC055402                           |
| Tcp11                    | Col5a2                         | 1700017D01Rik                      |
| Cyp2u1                   | Lrrc9                          | Acnat1                             |
| Uaca                     | Idi2                           | Adh7                               |
| Six4                     | Krt24                          | Bpifa2                             |
| Rpph1                    | Vmn2r76                        | 4933433G19Rik                      |
| Hist1h4h                 | Pdia4                          | 2310002L09Rik                      |
| Ppapdc1b                 | Large                          | Bfsp1                              |
| Hsph1                    | Heatr9                         | 2900060B14Rik                      |
| Calm4                    | Gm9839                         | 1700030O20Rik                      |
| Kcnk4                    | Syk                            | 2310007B03Rik                      |
| H1fnt                    | Col4a4                         | Calm4                              |
| Rik4930578I06            | Cacna1e                        | Bmp5                               |
| Spdef                    | Fn1                            | 1700039E15Rik                      |
| Mfap2                    | Hsph1                          | 4933402P03Rik                      |
| Gm19461                  | Tm4sf1                         | Cdkl1                              |
| Zmynd15                  | Tdrd12                         | Cd14                               |

|        |          |          |
|--------|----------|----------|
| Camp   | AW551984 | AI314278 |
| Bpifa2 | Dcpp1    | Ceacam18 |
| Dcpp1  | Dcpp2    | Ces2f    |
| Dcpp2  | Bpifa2   |          |

53

54

55

56

57

58

59

60

**Supplemental Figure 4: Top differentially expressed genes (DEG) between treatment groups.** Mice were treated with OXY-sKLH with or without IL-4 depletion (see Figure 6). Top 49-50 DEGs between treatment groups are listed as depicted in the heat map plots.

## References

61

62

63

1. Laudenbach, M. *et al.* Blocking interleukin-4 enhances efficacy of vaccines for treatment of opioid abuse and prevention of opioid overdose. *Sci Rep* **8**, 5508 (2018).
